# Supplementary material for: Structural insight into substrate preference for TET-mediated oxidation
Source: Springer Nature journal article supplement (doi:10.1038/nature15713), 2015-10-28
Supplement: 41586_2015_BFnature15713_MOESM71_ESM.pdf [file 41586_2015_BFnature15713_MOESM71_ESM.pdf]

**Supplementary Table 1. The DNAs used in this study**

|     |                                            |                                                                                                                                                                                       |
|-----|--------------------------------------------|---------------------------------------------------------------------------------------------------------------------------------------------------------------------------------------|
| D1  | palindromic 12-bp dsDNA                    | topstrand: 5'-ACCACXGGTGGT-3'<br>X=5mC, 5hmC or 5fC                                                                                                                                   |
| D2  | palindromic FAM-18-bp dsDNA                | topstrand: 5'-FAM-CAGCACACXGGTGTGCTG-3',<br>X=C, 5mC, 5hmC, 5fC or 5caC                                                                                                               |
| D3  | biotinylated 26-bp dsDNAs                  | topstrand:5'-biotin-CAGTAGTCTGGACACACXGGTCATGA-3',<br>bottom strand: 5'-TCATGACXGGTGTGTCCAGACTACTG-3',<br>X=5mC, 5hmC or 5fC                                                          |
| D4  | Biotin-free 26-bp dsDNAs                   | topstrand:5'-CAGTAGTCTGGACACACXGGTCATGA-3',<br>bottom strand: 5'-TCATGACXGGTGTGTCCAGACTACTG-3',<br>X=5C,5mC, 5hmC, 5fC or 5caC                                                        |
| D5  | palindromic 58-bpDNA dsDNA                 | topstrand:5'-ACGATCAGATCCTAAGGCATCAGCACACXGGTGTGCTGATGCCTTAGGATCTGATCGT-3',<br>X=5mC, 5hmC or 5fC                                                                                     |
| D6  | palindromic 58-bpDNA AT-rich dsDNA         | topstrand:5'-ACCAGCAGATGGCCAGGCATCAGATATAXGTATATCTGATGCCTGGCCATCTGCTGGT-3',<br>X=5mC, 5hmC or 5fC                                                                                     |
| D7  | 58-bpDNA CG-rich dsDNA                     | topstrand:5'-ACTCAACAGACTACACAGTAGTGCCCCCXGCC CAGATGCTATTCAGTAACTGACACTG-3';<br>bottom strand: 5'-CAGTGTGCTGACTGAATAGCATCTGGGXGGGGGGCACTACTGTGTAGTCTGTTGAGT -3'<br>X=5mC, 5hmC or 5fC |
| D8  | palindromic 100-bpDNA dsDNA                | topstrand:5'-GCTTGAGGTCCAAGCTAGCTACGATCAGATCCTAAGGCATCAGCACACXGGTGTGCTGATGCCTTAGGATCTGATCGTAGCTAGCTTGGACCTCCAAGC-3',<br>X=5mC, 5hmC or 5fC.                                           |
| D9  | deuterium labeled biotinylated 20-bp dsDNA | topstrand:5'- Biotin-CTTGACACACXGGTCATGA-3';<br>bottom strand: 5'-TCATGACCmGGTGTGTCCAAG -3'<br>X=[ <sup>2</sup> H] <sub>3</sub> -5mC                                                  |
| D10 | biotinylated 20-bp dsDNA                   | topstrand:5'- Biotin-CTTGACACACXGGTCATGA -3';<br>bottom strand: 5'- TCATGACCmGGTGTGTCCAAG -3'<br>X=5mC                                                                                |

The DNAs were synthesized and annealed for the measurements of enzymatic activities and DNA-binding affinities of TET proteins.

**Supplementary Table 2. TET activities on 5mC/5hm/5fC-DNA substrate**

|                         | 12.5 $\mu$ M TET1+58-bpDNA dsDNA |                   |                   |                   |
|-------------------------|----------------------------------|-------------------|-------------------|-------------------|
|                         | 5mC ( $\mu$ M)                   | 5hmC ( $\mu$ M)   | 5fC ( $\mu$ M)    | 5caC ( $\mu$ M)   |
| 5mC                     | 1.400                            | ND                | ND                | ND                |
| 5mC+TET1(12.5 $\mu$ M)  | 0.130 $\pm$ 0.023                | 0.550 $\pm$ 0.035 | 0.218 $\pm$ 0.014 | 0.272 $\pm$ 0.004 |
| 5hmC                    | ND                               | 1.400             | ND                | ND                |
| 5hmC+TET1(12.5 $\mu$ M) | ND                               | 0.806 $\pm$ 0.031 | 0.135 $\pm$ 0.028 | 0.139 $\pm$ 0.003 |
| 5fC                     | ND                               | ND                | 1.400             | ND                |
| 5fC+TET1(12.5 $\mu$ M)  | ND                               | ND                | 0.937 $\pm$ 0.085 | 0.199 $\pm$ 0.035 |
|                         | 5 $\mu$ M TET2+58-bpDNA dsDNA    |                   |                   |                   |
|                         | 5mC ( $\mu$ M)                   | 5hmC ( $\mu$ M)   | 5fC ( $\mu$ M)    | 5caC ( $\mu$ M)   |
| 5mC                     | 1.400                            | ND                | ND                | ND                |
| 5mC+TET2(5 $\mu$ M)     | 0.035 $\pm$ 0.008                | 0.224 $\pm$ 0.039 | 0.305 $\pm$ 0.033 | 0.529 $\pm$ 0.010 |
| 5hmC                    | ND                               | 1.400             | ND                | ND                |
| 5hmC+TET2(5 $\mu$ M)    |                                  | 0.591 $\pm$ 0.119 | 0.347 $\pm$ 0.033 | 0.293 $\pm$ 0.045 |
| 5fC                     | ND                               | ND                | 1.400             | ND                |
| 5fC+TET2(5 $\mu$ M)     | ND                               | ND                | 0.868 $\pm$ 0.063 | 0.426 $\pm$ 0.011 |
|                         | 1 $\mu$ M TET2+58-bpDNA dsDNA    |                   |                   |                   |
|                         | 5mC ( $\mu$ M)                   | 5hmC ( $\mu$ M)   | 5fC ( $\mu$ M)    | 5caC ( $\mu$ M)   |
| 5mC                     | 1.400                            | ND                | ND                | ND                |
| 5mC+TET2(1 $\mu$ M)     | 0.124 $\pm$ 0.008                | 1.019 $\pm$ 0.106 | 0.409 $\pm$ 0.069 | 0.069 $\pm$ 0.016 |
| 5hmC                    | ND                               | 1.400             | ND                | ND                |
| 5hmC+TET2(1 $\mu$ M)    | ND                               | 1.253 $\pm$ 2.56  | 0.172 $\pm$ 0.047 | 0.046 $\pm$ 0.046 |
| 5fC                     | ND                               | ND                | 1.400             | ND                |
| 5fC+TET2(1 $\mu$ M)     | ND                               | ND                | 1.248 $\pm$ 0.277 | ND                |

58-bp DNA substrate containing one 5mCpG/5hmCpG/5fCpG site was incubated with TET1 or TET2 for reaction. ND indicates Non-Detectable. Quantification was calculated from three independent assays and the error bars represent  $\pm$  SD for triplicate experiments. Note that 5  $\mu$ M TET2 shows stronger enzymatic activity than 12.5  $\mu$ M TET1. The results were reproducibly obtained under our experimental conditions. One possible explanation is that the difference does exist between TET1 and TET2 although we could not rule out the possibility that the difference is resulted from different quality/stability of the purified recombinant TET1 and TET2.

**Supplementary Table 3. TET activities on 5mC/5hmC/5fC-DNA substrate at different time points**

| Substrate | Time (min) | 5mC ( $\mu\text{M}$ ) | 5hmC ( $\mu\text{M}$ ) | 5fC ( $\mu\text{M}$ ) | 5caC ( $\mu\text{M}$ ) |
|-----------|------------|-----------------------|------------------------|-----------------------|------------------------|
| 5mC-DNA   | 0          | 1.400                 | ND                     | ND                    | ND                     |
|           | 5          | 0.363 $\pm$ 0.052     | 0.920 $\pm$ 0.62       | 0.039 $\pm$ 0.030     | ND                     |
|           | 10         | 0.246 $\pm$ 0.021     | 1.047 $\pm$ 0.057      | 0.238 $\pm$ 0.016     | ND                     |
|           | 20         | 0.155 $\pm$ 0.006     | 1.003 $\pm$ 0.081      | 0.346 $\pm$ 0.043     | 0.021 $\pm$ 0.021      |
|           | 30         | 0.132 $\pm$ 0.005     | 1.048 $\pm$ 0.109      | 0.375 $\pm$ 0.033     | 0.053 $\pm$ 0.012      |
|           | 40         | 0.124 $\pm$ 0.008     | 1.019 $\pm$ 0.106      | 0.409 $\pm$ 0.069     | 0.069 $\pm$ 0.016      |
| 5hmC-DNA  | 0          |                       | 1.400                  | ND                    | ND                     |
|           | 5          |                       | 1.426 $\pm$ 0.163      | 0.038 $\pm$ 0.038     | ND                     |
|           | 10         |                       | 1.423 $\pm$ 0.127      | 0.134 $\pm$ 0.049     | ND                     |
|           | 20         |                       | 1.128 $\pm$ 0.179      | 0.122 $\pm$ 0.028     | 0.026 $\pm$ 0.026      |
|           | 30         |                       | 1.167 $\pm$ 0.210      | 0.149 $\pm$ 0.029     | 0.030 $\pm$ 0.030      |
|           | 40         |                       | 1.253 $\pm$ 0.256      | 0.172 $\pm$ 0.047     | 0.046 $\pm$ 0.046      |
| 5fC-DNA   | 0          |                       |                        | 1.400                 | ND                     |
|           | 5          |                       |                        | 1.288 $\pm$ 0.293     | ND                     |
|           | 10         |                       |                        | 1.316 $\pm$ 0.266     | ND                     |
|           | 20         |                       |                        | 1.299 $\pm$ 0.252     | ND                     |
|           | 30         |                       |                        | 1.329 $\pm$ 0.337     | ND                     |
|           | 40         |                       |                        | 1.249 $\pm$ 0.277     | ND                     |

58-bp DNA substrate containing one 5mCpG /5hmCpG/5fCpG site was incubated with 1  $\mu\text{M}$  TET2 for reaction. ND indicates Non-Detectable. Quantification was calculated from three independent assays and the error bars represent  $\pm$  SD for triplicate experiments.

**Supplementary Table 4. Steady-state kinetic analyses of TET2-mediated oxidation**

| 0.5 $\mu$ M TET2+58-bp 5mC dsDNA |                        | 2 $\mu$ M TET2+58-bp 5hmC dsDNA |                       | 3 $\mu$ M TET2+58-bp 5fC dsDNA |                        |
|----------------------------------|------------------------|---------------------------------|-----------------------|--------------------------------|------------------------|
| 5mC Concentration ( $\mu$ M)     | 5hmC generation (nM/s) | 5hmC Concentration ( $\mu$ M)   | 5fC generation (nM/s) | 5hmC Concentration ( $\mu$ M)  | 5caC generation (nM/s) |
| 0.070                            | ND                     | 0.140                           | ND                    | 0.140                          | ND                     |
| 0.140                            | 0.319 $\pm$ 0.073      | 0.350                           | 0.402 $\pm$ 0.042     | 0.350                          | 0.331 $\pm$ 0.001      |
| 0.350                            | 0.399 $\pm$ 0.071      | 0.700                           | 0.596 $\pm$ 0.088     | 0.700                          | 0.451 $\pm$ 0.029      |
| 0.700                            | 0.707 $\pm$ 0.030      | 1.050                           | 0.644 $\pm$ 0.056     | 1.400                          | 0.795 $\pm$ 0.030      |
| 1.05                             | 0.728 $\pm$ 0.026      | 1.400                           | 0.837 $\pm$ 0.32      | 2.800                          | 0.925 $\pm$ 0.039      |
| 1.40                             | 0.745 $\pm$ 0.039      | 2.800                           | 0.917 $\pm$ 0.032     | 5.600                          | 1.112 $\pm$ 0.073      |

58-bp DNA substrate containing one 5mCpG /5hmCpG/5fCpG site was incubated with 0.5  $\mu$ M, 2  $\mu$ M, and 3  $\mu$ M TET2, respectively. ND indicates Non-Detectable. Quantification was calculated from two independent assays and the error bars represent  $\pm$  SD for duplicate experiments.

**Supplementary Table 5. TET2 activities on substrates with different lengths and sequences**

| Reaction             | 5mC ( $\mu$ M)    | 5hmC ( $\mu$ M)   | 5fC ( $\mu$ M)    | 5caC ( $\mu$ M)   |
|----------------------|-------------------|-------------------|-------------------|-------------------|
| 26-bp dsDNA          |                   |                   |                   |                   |
| 5mC                  | 1.400             | ND                | ND                | ND                |
| 5mC+TET2(1 $\mu$ M)  | 0.107 $\pm$ 0.008 | 0.586 $\pm$ 0.046 | 0.403 $\pm$ 0.033 | 0.297 $\pm$ 0.044 |
| 5hmC                 | ND                | 1.400             | ND                | ND                |
| 5hmC+TET2(1 $\mu$ M) | ND                | 0.838 $\pm$ 0.226 | 0.499 $\pm$ 0.071 | 0.239 $\pm$ 0.057 |
| 5fC                  | ND                | ND                | 1.400             | ND                |
| 5fC+TET2(1 $\mu$ M)  | ND                | ND                | 0.808 $\pm$ 0.042 | 0.560 $\pm$ 0.012 |
| 100-bp dsDNA         |                   |                   |                   |                   |
| 5mC                  | 1.400             | ND                | ND                | ND                |
| 5mC+TET2(1 $\mu$ M)  | 0.572 $\pm$ 0.102 | 0.864 $\pm$ 0.102 | 0.046 $\pm$ 0.008 | 0.021 $\pm$ 0.002 |
| 5hmC                 | ND                | 1.400             | ND                | ND                |
| 5hmC+TET2(1 $\mu$ M) | ND                | 1.091 $\pm$ 0.055 | 0.148 $\pm$ 0.034 | 0.044 $\pm$ 0.010 |
| 5fC                  | ND                | ND                | 1.400             | ND                |
| 5fC+TET2(1 $\mu$ M)  | ND                | ND                | 1.311 $\pm$ 0.064 | 0.08 $\pm$ 0.007  |
| 58-bp dsDNA          |                   |                   |                   |                   |
| 5mC                  | 1.400             | ND                | ND                | ND                |
| 5mC+TET2(1 $\mu$ M)  | 0.368 $\pm$ 0.47  | 0.671 $\pm$ 0.114 | 0.262 $\pm$ 0.046 | 0.071 $\pm$ 0.030 |
| 5hmC                 | ND                | 1.400             | ND                | ND                |
| 5hmC+TET2(1 $\mu$ M) | ND                | 1.025 $\pm$ 0.044 | 0.378 $\pm$ 0.021 | 0.194 $\pm$ 0.006 |
| 5fC                  | ND                | ND                | 1.4               | ND                |
| 5fC+TET2(1 $\mu$ M)  | ND                | ND                | 1.361 $\pm$ 0.073 | 0.087 $\pm$ 0.010 |
| 58-bp AT-rich dsDNA  |                   |                   |                   |                   |
| 5mC                  | 1.400             | ND                | ND                | ND                |
| 5mC+TET2(1 $\mu$ M)  | 0.284 $\pm$ 0.049 | 0.838 $\pm$ 0.057 | 0.180 $\pm$ 0.072 | 0.031 $\pm$ 0.007 |
| 5hmC                 | ND                | 1.400             | ND                | ND                |
| 5hmC+TET2(1 $\mu$ M) | ND                | 0.693 $\pm$ 0.075 | 0.411 $\pm$ 0.078 | 0.196 $\pm$ 0.006 |
| 5fC                  | ND                | ND                | 1.400             | ND                |
| 5fC+TET2(1 $\mu$ M)  | ND                | ND                | 0.893 $\pm$ 0.018 | 0.574 $\pm$ 0.08  |
| 58-bp CG-rich dsDNA  |                   |                   |                   |                   |
| 5mC                  | 1.400             | ND                | ND                | ND                |
| 5mC+TET2(1 $\mu$ M)  | 0.270 $\pm$ 0.051 | 1.006 $\pm$ 0.067 | 0.167 $\pm$ 0.035 | 0.081 $\pm$ 0.014 |
| 5hmC                 | ND                | 1.400             | ND                | ND                |
| 5hmC+TET2(1 $\mu$ M) | ND                | 1.217 $\pm$ 0.042 | 0.166 $\pm$ 0.043 | 0.018 $\pm$ 0.005 |
| 5fC                  | ND                | ND                | 1.400             | ND                |
| 5fC+TET2(1 $\mu$ M)  | ND                | ND                | 1.391 $\pm$ 0.103 | 0.068 $\pm$ 0.012 |

Various DNA substrates were incubated with wild-type 1  $\mu$ M TET2 protein for reaction. ND indicates Non-Detectable. Quantification was calculated from three independent assays and the error bars represent  $\pm$  SD for triplicate experiments.

**Supplementary Table 6. Effects of substrate and product on activities of TET2**

| Reaction                                                                                  | 5mC ( $\mu\text{M}$ ) | 5hmC ( $\mu\text{M}$ ) | 5fC ( $\mu\text{M}$ ) | 5caC ( $\mu\text{M}$ ) |
|-------------------------------------------------------------------------------------------|-----------------------|------------------------|-----------------------|------------------------|
| 1 $\mu\text{M}$ TET2 + 26-bp biotinylated 5mC-DNA<br>In the presence of 26-bp 5C/5hmC-DNA |                       |                        |                       |                        |
| Biotin-5mC (no TET2)                                                                      | 1.400                 | ND                     | ND                    | ND                     |
| Biotin-5mC                                                                                | 0.174 $\pm$ 0.038     | 0.925 $\pm$ 0.123      | 0.431 $\pm$ 0.083     | 0.293 $\pm$ 0.219      |
| Biotin-5mC +1.4 $\mu\text{M}$ 5C                                                          | 0.205 $\pm$ 0.059     | 0.786 $\pm$ 0.010      | 0.303 $\pm$ 0.059     | 0.129 $\pm$ 0.098      |
| Biotin-5mC+0.7 $\mu\text{M}$ 5hmC                                                         | 0.182 $\pm$ 0.039     | 0.946 $\pm$ 0.041      | 0.343 $\pm$ 0.099     | 0.188 $\pm$ 0.137      |
| Biotin-5mC +1.4 $\mu\text{M}$ 5hmC                                                        | 0.213 $\pm$ 0.044     | 1.168 $\pm$ 0.035      | 0.341 $\pm$ 0.135     | 0.094 $\pm$ 0.048      |
| 1 $\mu\text{M}$ TET2 + 26-bp biotinylated 5hmC-DNA<br>In the presence of 26-bp 5C/5fC-DNA |                       |                        |                       |                        |
| Biotin-5hmC (no TET2)                                                                     |                       | 1.400                  | ND                    | ND                     |
| Biotin-5hmC                                                                               |                       | 0.663 $\pm$ 0.87       | 0.423 $\pm$ 0.017     | 0.378 $\pm$ 0.143      |
| Biotin-5hmC +1.4 $\mu\text{M}$ 5C                                                         |                       | 0.772 $\pm$ 0.058      | 0.351 $\pm$ 0.035     | 0.137 $\pm$ 0.090      |
| Biotin-5hmC+0.7 $\mu\text{M}$ 5fC                                                         |                       | 0.706 $\pm$ 0.076      | 0.388 $\pm$ 0.027     | 0.246 $\pm$ 0.168      |
| Biotin-5hmC +1.4 $\mu\text{M}$ 5fC                                                        |                       | 0.751 $\pm$ 0.096      | 0.457 $\pm$ 0.076     | 0.168 $\pm$ 0.119      |
| 1 $\mu\text{M}$ TET2 + 26-bp biotinylated 5fC-DNA<br>In the presence of 26-bp 5C/5caC-DNA |                       |                        |                       |                        |
| Biotin-5fC (no TET2)                                                                      |                       |                        | 1.400                 | ND                     |
| Biotin-5fC                                                                                |                       |                        | 1.157 $\pm$ 0.085     | 0.282 $\pm$ 0.116      |
| Biotin-5fC +1.4 $\mu\text{M}$ 5C                                                          |                       |                        | 1.096 $\pm$ 0.039     | 0.164 $\pm$ 0.079      |
| Biotin-5fC+0.7 $\mu\text{M}$ 5caC                                                         |                       |                        | 0.989 $\pm$ 0.038     | 0.428 $\pm$ 0.085      |
| Biotin-5fC +1.4 $\mu\text{M}$ 5caC                                                        |                       |                        | 0.986 $\pm$ 0.075     | 0.430 $\pm$ 0.063      |

Various DNA substrates were incubated with wild-type 1  $\mu\text{M}$  TET2 protein for reaction. 26-bp biotinylated DNA was purified with streptavidin beads and applied for LC-MS/MS detection. ND indicates Non-Detectable. Quantification was calculated from three independent assays and the error bars represent  $\pm$  SD for triplicate experiments.

**Supplementary Table 7. Decreased enzymatic activities of TET2 by substrate deuteration**

| 0.25 μM TET2 + 20-bp biotinylated 5mC-DNA                                 |                                             |                                              |                                             |              |
|---------------------------------------------------------------------------|---------------------------------------------|----------------------------------------------|---------------------------------------------|--------------|
|                                                                           | 5mC<br>(μM)                                 | 5hmC<br>(μM)                                 | 5fC<br>(μM)                                 | 5caC<br>(μM) |
| Biotin-5mC (no TET2)                                                      | 1.400                                       | ND                                           | ND                                          | ND           |
| Biotin-5mC (with TET2)                                                    | 1.140±0.196                                 | 0.117±0.063                                  | ND                                          | ND           |
| 0.5 μM TET2 + 20-bp biotinylated 5mC-DNA                                  |                                             |                                              |                                             |              |
| Biotin-5mC (no TET2)                                                      | 1.400                                       | ND                                           | ND                                          | ND           |
| Biotin-5mC (with TET2)                                                    | 1.415±0.124                                 | 0.758±0.051                                  | ND                                          | ND           |
| 0.25 μM TET2 + 20-bp biotinylated [ <sup>2</sup> H] <sub>3</sub> -5mC-DNA |                                             |                                              |                                             |              |
|                                                                           | [ <sup>2</sup> H] <sub>3</sub> -5mC<br>(μM) | [ <sup>2</sup> H] <sub>2</sub> -5hmC<br>(μM) | [ <sup>2</sup> H] <sub>1</sub> -5fC<br>(μM) | 5caC<br>(μM) |
| Biotin-[ <sup>2</sup> H] <sub>3</sub> -5mC (no TET2)                      | 1.400                                       | ND                                           | ND                                          | ND           |
| Biotin-[ <sup>2</sup> H] <sub>3</sub> -5mC (with TET2)                    | 1.110±0.137                                 | ND                                           | ND                                          | ND           |
| 0.5 μM TET2 + 20-bp biotinylated [ <sup>2</sup> H] <sub>3</sub> -5mC-DNA  |                                             |                                              |                                             |              |
| Biotin-[ <sup>2</sup> H] <sub>3</sub> -5mC (no TET2)                      | 1.400                                       | ND                                           | ND                                          | ND           |
| Biotin-[ <sup>2</sup> H] <sub>3</sub> -5mC (with TET2)                    | 1.375±0.204                                 | 0.158±0.025                                  | ND                                          | ND           |

20-bp DNA substrate containing one 5mCpG/[<sup>2</sup>H]<sub>3</sub>-5mCpG site was incubated with 0.25 μM, 0.5 μM TET2 at 37°C for 10 min followed by heat at 65°C for 10 min, respectively. 20-bp biotinylated DNA was purified with streptavidin beads and applied for LC-MS/MS detection. ND indicates Non-Detectable. Quantification was calculated from three independent assays and the error bars represent ± SD for triplicate experiments.
